# Supplementary material
Source: PubMed Central journal article supplement (PMC7104992)
Supplement: mmc1.pdf [file mmc1.pdf]

**Cell Host & Microbe, Volume 23**

**Supplemental Information**

**Dampened STING-Dependent**

**Interferon Activation in Bats**

**Jiazheng Xie, Yang Li, Xurui Shen, Geraldine Goh, Yan Zhu, Jie Cui, Lin-Fa Wang, Zheng-Li Shi, and Peng Zhou**

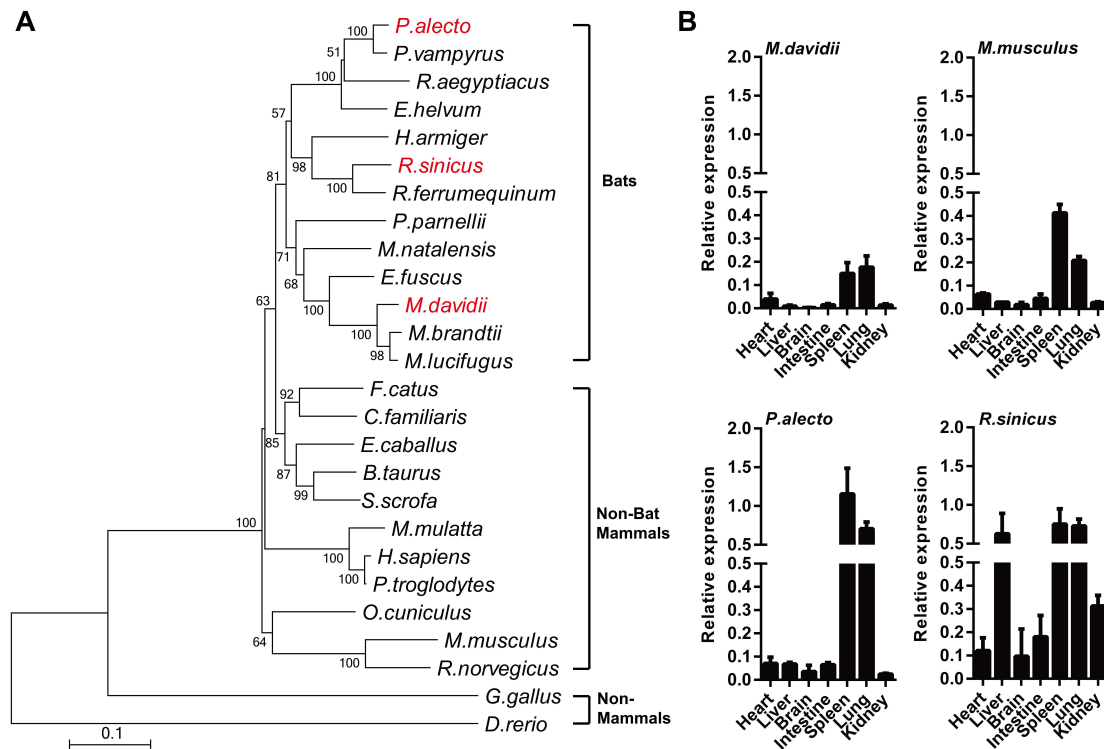

**Figure S1. Phylogenetic tree of STING and Quantitation of STING mRNA in tissues of *Rhinolophus sinicus* (*R<sub>s</sub>*), *Myotis davidii* (*M<sub>d</sub>*), *Pteropus alecto* (*P<sub>a</sub>*) bats and mice.** Related to Figure 1. (A) Phylogenetic tree of STING. The three representative bat STING genes analyzed in this study were highlighted in red. The full species name, accession numbers of STING and SRA accession numbers are listed in Table S1. Tree was constructed by MEGA (Version 4) with the neighbor-joining statistical method. Bootstrap values were calculated from 1000 replicates and values >50 are shown. (B) Tissues were collected from healthy wild-caught *R<sub>s</sub>* (n=3), *M<sub>d</sub>* (n=3), *P<sub>a</sub>* (n=2) and cultured BALB/c mice (n=3). The mRNA level was normalized to housekeeping gene SNRPD3 and presented as the mean  $\pm$  SD.

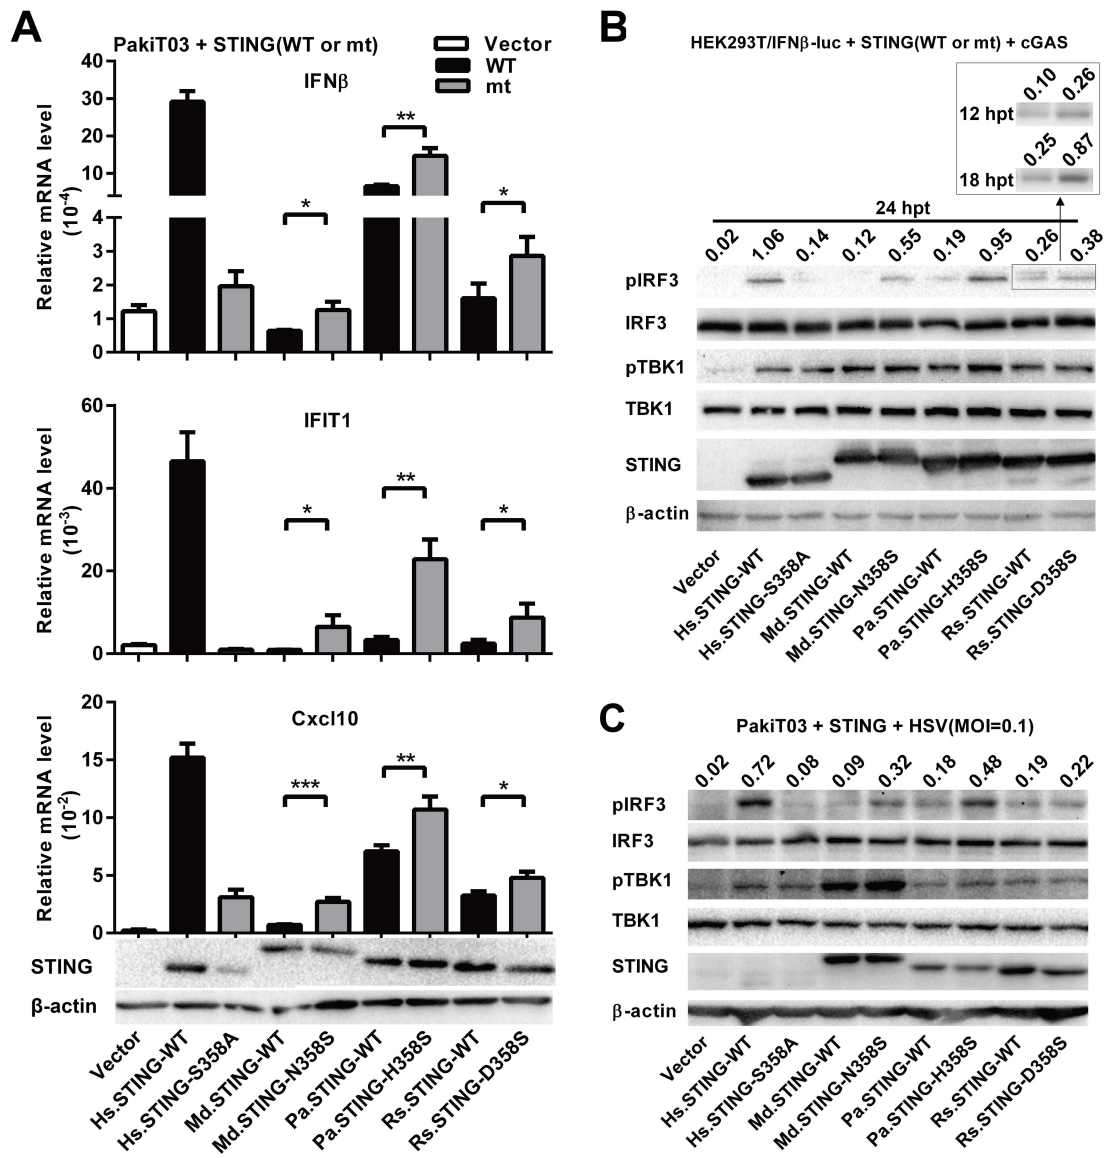

**Figure S2. Effects of Serine 358 on the Dampening of IFN Activation and Phosphorylation of IRF3 and TBK1.** Related to Figure 2. (A) PaKiT03 cells were transfected with indicated STING plasmids and gene expression (normalized to SNRPD3) was determined by qPCR 24 hours later. Data are presented as the mean  $\pm$  SD,  $n=3$ , \* $p < 0.05$ , \*\* $p < 0.01$ , \*\*\* $p < 0.001$  (Student's t test). (B) HEK293T cells were co-transfected with STING, cGAS, IFN $\beta$  promoter firefly luciferase and renilla luciferase plasmids. The levels of p-IRF3, IRF3, pTBK1, TBK1 and STING were determined 24 hours post transfection. For the two *R.sinicus* STING samples, the p-IRF3 levels of samples at 12, 18 hours post transfection were further indicated on the top. (C) PaKiT03 cells were transfected with indicated STING plasmids followed by

infection with HSV-luciferase at MOI=0.1 at 24 hours post transfection. At 24 hours post infection, the levels of p-IRF3, IRF3, pTBK1, TBK1 and STING were determined by Western blot. The amount of pIRF3 was counted by ImageJ software and labeled. Three independent experiments were performed. Abbreviations: WT = wild type; mt = mutant; *Hs* = *Homo sapiens*; *Md* = *Myotis davidii*; *Pa* = *Pteropus alecto*; *Rs* = *Rhinolophus sinicus*.

**TableS1. Genbank accession numbers of STING sequences or SRA data ID used in this study. Related to Figure 1.**

|                              | <b>Full name</b>                 | <b>Abbreviation</b>    | <b>Accession numbers</b>                    |
|------------------------------|----------------------------------|------------------------|---------------------------------------------|
| <b>Bats</b>                  | <i>Artibeus jamaicensis</i>      | <i>A.jamaicensis</i>   | SRR539297                                   |
|                              | <i>Aselliscus stoliczkanus</i>   | <i>A.stoliczkanus</i>  | SRR2153215                                  |
|                              | <i>Carollia perspicillata</i>    | <i>C.perspicillata</i> | SRR2130341-SRR2130344                       |
|                              | <i>Cynopterus sphinx</i>         | <i>C.sphinx</i>        | SRR2153213                                  |
|                              | <i>Desmodus rotundus</i>         | <i>D.rotundus</i>      | SRR606902,SRR606899,<br>SRR606908,SRR606911 |
|                              | <i>Eptesicus fuscus</i>          | <i>E.fuscus</i>        | XP_008139824.1                              |
|                              | <i>Eidolon helvum</i>            | <i>E.helvum</i>        | MF174844                                    |
|                              | <i>Eonycteris spelaea</i>        | <i>E.spelaea</i>       | SRR1515272                                  |
|                              | <i>Hipposideros armiger</i>      | <i>H.armiger</i>       | XP_019517728.1                              |
|                              | <i>Hipposideros pratti</i>       | <i>H.pratti</i>        | SRR2153216                                  |
|                              | <i>Myotis brandtii</i>           | <i>M.brandtii</i>      | XP_005881105.1                              |
|                              | <i>Myotis davidii</i>            | <i>M.davidii</i>       | XP_006772500.1                              |
|                              | <i>Murina leucogaster</i>        | <i>M.leucogaster</i>   | SRR2153222                                  |
|                              | <i>Myotis lucifugus</i>          | <i>M.lucifugus</i>     | XP_006086577.1                              |
|                              | <i>Megaderma lyra</i>            | <i>M.lyra</i>          | SRR2153218                                  |
|                              | <i>Miniopterus natalensis</i>    | <i>M.natalensis</i>    | XP_016059234.1                              |
|                              | <i>Myotis ricketti</i>           | <i>M.ricketti</i>      | SRR2153224                                  |
|                              | <i>Miniopterus schreibersii</i>  | <i>M.schreibersii</i>  | SRR974728-SRR974741                         |
|                              | <i>Pteropus alecto</i>           | <i>P.alecto</i>        | XP_006923104.1                              |
|                              | <i>Pteronotus parnellii</i>      | <i>P.parnellii</i>     | MF174846                                    |
|                              | <i>Pteropus vampyrus</i>         | <i>P.vampyrus</i>      | XP_011380567.1                              |
|                              | <i>Rousettus aegyptiacus</i>     | <i>R.aegyptiacus</i>   | XP_016021870.1                              |
|                              | <i>Rhinolophus ferrumequinum</i> | <i>R.ferrumequinum</i> | MF174845                                    |
|                              | <i>Rousettus leschenaultii</i>   | <i>R.leschenaultii</i> | SRR2153214                                  |
|                              | <i>Rhinolophus macrotis</i>      | <i>R.macrotis</i>      | SRR1584445-SRR1584447                       |
|                              | <i>Rhinolophus pusillus</i>      | <i>R.pusillus</i>      | SRR2153217                                  |
|                              | <i>Rhinolophus sinicus</i>       | <i>R.sinicus</i>       | XP_019595754.1                              |
| <i>Scotophilus kuhlii</i>    | <i>S.kuhlii</i>                  | SRR2153223             |                                             |
| <i>Taphozous melanopogon</i> | <i>T.melanopogon</i>             | SRR2153220             |                                             |
| <i>Tadarida teniotis</i>     | <i>T.teniotis</i>                | SRR2153221             |                                             |
| <b>Non-bat animals</b>       | <i>Mus musculus</i>              | <i>M.musculus</i>      | NP_082537.1                                 |
|                              | <i>Rattus norvegicus</i>         | <i>R.norvegicus</i>    | NP_001102592.1                              |
|                              | <i>Homo sapiens</i>              | <i>H.sapiens</i>       | NP_938023.1                                 |
|                              | <i>Loxodonta africana</i>        | <i>L.africana</i>      | XP_003404845.1                              |
|                              | <i>Pan troglodytes</i>           | <i>P.troglodytes</i>   | XP_001135484.1                              |
|                              | <i>Macaca mulatta</i>            | <i>M.mulatta</i>       | EHH26836.1                                  |
|                              | <i>Bos taurus</i>                | <i>B.taurus</i>        | NP_001039822.1                              |
|                              | <i>Sus scrofa</i>                | <i>S.scrofa</i>        | NP_001136310.1                              |
|                              | <i>Felis catus</i>               | <i>F.catus</i>         | XP_003980949.1                              |
|                              | <i>Canis lupus familiaris</i>    | <i>C.familiaris</i>    | XP_848338.2                                 |
|                              | <i>Equus caballus</i>            | <i>E.caballus</i>      | XP_005599422.1                              |
|                              | <i>Oryctolagus cuniculus</i>     | <i>O.cuniculus</i>     | XP_002710295.1                              |
|                              | <i>Gallus gallus</i>             | <i>G.gallus</i>        | NP_001292081.1                              |
|                              | <i>Danio rerio</i>               | <i>D.rerio</i>         | NP_001265766.1                              |

**Table S2. Primers used in this study.** Related to Figure 2 and STAR methods.

| No. | Primer Name             | Sequence (5' ->3')                     | Purpose                                                                 |
|-----|-------------------------|----------------------------------------|-------------------------------------------------------------------------|
| 1   | Homo/Md/Rs.STING_NotI_F | ATTGCGGCCCGCCACCACCATGCCCACTCCAGC      | Clone the <i>Homo sapiens/Myotis</i>                                    |
| 2   | Pa.STING_NotI_F         | ATTGCGGCCCGCCACCACCATGCCCACTCCAGC      | <i>davidii/Rhinolophus sinicus/Pteropus</i>                             |
| 3   | Md/Pa.STING_Nhel_R      | CTAGCTAGCGAAGATATCTGTGCGGA             | <i>alecto</i> STING into pCAGGS vector                                  |
| 4   | Homo.STING_Nhel_R       | CTAGCTAGCAGAGAAATCCGTGCG               | (modified with an in-frame S tag at                                     |
| 5   | Rs.STING_Nhel_R         | CTAGCTAGCGAAGACATCTGTGCGGA             | the C-terminal) with N-term Kozak<br>sequence and no stop codon         |
| 6   | Md.STING_N358S-F        | TCCACATTGTCCCAAGAGCCTGAGCTCCTCATC      | Site-directed mutagenesis primers                                       |
| 7   | Md.STING_N358S-R        | GCTCTTGGGACAATGTGGAAGAGTCAGGCACC       | for <i>Myotis davidii</i> STING                                         |
| 8   | Homo.STING_S358A_F      | TCCACGATGGCCCAAGAGCCTGAGCTCCTCATC      | Site-directed mutagenesis primers                                       |
| 9   | Homo.STING_S358A_R      | CTCTTGGCCATCGTGGAGTACTGGGCACC          | for <i>Homo sapiens</i> STING                                           |
| 10  | Rs.STING_D358S-F        | CCACGCTATCCGAAGAGCCCCAGCTCCTCA         | Site-directed mutagenesis primers                                       |
| 11  | Rs.STING_D358S-R        | GGCTCTTCGGATAGCGTGAAGGTTCCGGC          | for <i>Rhinolophus sinicus</i> STING                                    |
| 12  | Pa.STING_H358S-F        | CCACGCTGTCCCAAGAGCCCAGCTCCTCATCAG      | Site-directed mutagenesis primers                                       |
| 13  | Pa.STING_H358S-R        | GAGCTCGGGCTCTTGGGACAGCGTGGAGGAGACAGGCT | for <i>Pteropus alecto</i> STING                                        |
| 14  | Rs.STING_Age I-F        | CCCACCGGTATGCCCACTCCAGCCTACAT          | Clone the <i>Rhinolophus sinicus</i>                                    |
| 15  | Rs.STING_Not I_R        | ATTGCGGCCCGCGAAGACATCTGTGCGGAGTGGGAG   | STING into pQCXIH (modified with<br>in-frame GFP tag at the C-terminal) |
| 16  | Mus.Snrdp3_QPCR_F       | ATTGGTGTGCCGATTAAGTCT                  | qPCR primers for mouse reference                                        |
| 17  | Mus.Snrdp3_QPCR_R       | ATACTTCCCCGGTGTGGTCT                   | gene SNRPD3                                                             |
| 18  | Mus.STING_QPCR_F        | TATACCTCAGTTGGATGTTTGGC                | qPCR primers for mouse STING                                            |
| 19  | Mus.STING_QPCR_R        | CTGGAGTCAAGCTCTGAAGGC                  |                                                                         |
| 20  | Mus.IRF7_QPCR_F         | GAGACTGGCTATTGGGGGAG                   | qPCR primers for mouse IRF7                                             |
| 21  | Mus.IRF7_QPCR_R         | GACCGAAATGCTTCCAGGG                    |                                                                         |
| 22  | Mus.IFNB_QPCR_F         | AGCTCCAAGAAAGGACGAACA                  | qPCR primers for mouse IFN $\beta$                                      |
| 23  | Mus.IFNB_QPCR_R         | GCCCTGTAGGTGAGGTTGAT                   |                                                                         |
| 24  | Md.SNRPD3_QPCR_F        | ACCGCGGAAGCTCATC                       | qPCR primers for <i>Myotis davidii</i>                                  |
| 25  | Md.SNRPD3_QPCR_R        | TGTTGGACATCTGGCAGTTCA                  | reference gene SNRPD3                                                   |
| 26  | Md.STING_QPCR_F         | TGTTCAAGCGAGTCTGCAGTCT                 | qPCR primers for <i>Myotis davidii</i>                                  |
| 27  | Md.STING_QPCR_R         | TCACAGCCCTCCGGTAGCT                    | STING                                                                   |
| 28  | Rs.STING_QPCR-F         | CCAGACACTCGCGGACATC                    | qPCR primers for <i>Rhinolophus</i>                                     |
| 29  | Rs.STING_QPCR-R         | GCAGCTTCCAGGTAGACAATGA                 | <i>sinicus</i> STING                                                    |
| 30  | Rs.SNRPD3_QPCR-F        | TGAGACAAACTGGTGGAGGTGTA                | qPCR primers for <i>Rhinolophus</i>                                     |
| 31  | Rs.SNRPD3_QPCR-R        | GGACATCTGGCAGTTCATGTTG                 | <i>sinicus</i> reference gene SNRPD3                                    |
| 32  | Rs.IFNB1_QPCR-F         | ACCTCCTGTGGCAGTTGAATG                  | qPCR primers for <i>Rhinolophus</i>                                     |
| 33  | Rs.IFNB1_QPCR-R         | GCTTAAAGTCCATCCTGTCCCTTGA              | <i>sinicus</i> IFN $\beta$                                              |
| 34  | Rs.IRF7_QPCR-F          | TCCCACACTACACCATCTAC                   | qPCR primers for <i>Rhinolophus</i>                                     |
| 35  | Rs.IRF7_QPCR-R          | TTCCCGTGTACATGCTCC                     | <i>sinicus</i> IRF7                                                     |
| 36  | Pa.STING_QPCR-F         | GCCGGACGCTTGAGGATAT                    | qPCR primers for <i>Pteropus alecto</i>                                 |
| 37  | Pa.STING_QPCR-R         | TCCTCTGTAGGTTCTGGTAGACAA               | STING                                                                   |
| 38  | Pa.SNRPD3_QPCR-F        | AGGTATACATCCGTGGCAGC                   | qPCR primers for <i>Pteropus alecto</i>                                 |
| 39  | Pa.SNRPD3_QPCR-R        | CCACTTGGGCCTTCAAGAATA                  | SNRPD3                                                                  |
| 40  | Pa.IFNB1_QPCR-F         | CTTAGCACTGGCTGGAATGAA                  | qPCR primers for <i>Pteropus alecto</i>                                 |
| 41  | Pa.IFNB1_QPCR-R         | TGCCACCGAGTGTCTCA                      | IFN $\beta$                                                             |
| 42  | Pa.IFIT1_QPCR-F         | CCTCCACCCATCTTAGGTTTATAG               | qPCR primers for <i>Pteropus alecto</i>                                 |
| 43  | Pa.IFIT1_QPCR-R         | CATCACTGGGTACTCTCATGTC                 | IFIT1                                                                   |
| 44  | Pa.Cxcl10_QPCR-F        | TGCAAGTCAATCATGTCCACAA                 | qPCR primers for <i>Pteropus alecto</i>                                 |
| 45  | Pa.Cxcl10_QPCR-R        | CAGACATCTTTTTTCCCGTTCT                 | Cxcl10                                                                  |
